# Supplementary material for: Digital PCR Panel for Sensitive Hematopoietic Chimerism Quantification after Allogeneic Stem Cell Transplantation
Source: PubMed Central journal article supplement (PMC5037792; doi:10.3390/ijms17091515), 2016-09-09
Supplement: ijms-17-01515-s001.pdf [file ijms-17-01515-s001.pdf]

# Supplementary Materials: Digital PCR Panel for Sensitive Hematopoietic Chimerism Quantification after Allogeneic Stem Cell Transplantation

Tanja Stahl, Caroline Rothe, Manja U. Böhme, Aloisa Kohl, Nicolaus Kröger and Boris Fehse

**Table S1.** Population data for the tested genetic markers (DIPs). Allele frequencies are indicated for Deletion–Insertion Polymorphisms (DIPs) tested in this study.

| DIP Locus | H (obs) | H (exp) | Allele Frequency <sup>1</sup> |                     |                |             |               |             |                |             |               |             |
|-----------|---------|---------|-------------------------------|---------------------|----------------|-------------|---------------|-------------|----------------|-------------|---------------|-------------|
|           |         |         | German Population             |                     | dbSNP European |             | dbSNP Amerind |             | dbSNP Japanese |             | dbSNP African |             |
|           |         |         | Del.                          | Ins.                | Del.           | Ins.        | Del.          | Ins.        | Del.           | Ins.        | Del.          | Ins.        |
| DP67      | 0.44    | 0.44    | <b>0.33</b> <sup>b</sup>      | (0.67) <sup>*</sup> | <b>0.39</b>    | 0.61        | <b>0.70</b>   | 0.30        | <b>0.49</b>    | 0.51        | <b>0.31</b>   | 0.69        |
| DP70      | 0.38    | 0.50    | <b>0.47</b>                   | <b>0.53</b>         | <b>0.52</b>    | <b>0.48</b> | <b>0.24</b>   | <b>0.76</b> | 0.30           | 0.70        | 0.15          | 0.85        |
| DP88      | 0.54    | 0.50    | <b>0.54</b>                   | <b>0.46</b>         | <b>0.50</b>    | <b>0.50</b> | <b>0.43</b>   | <b>0.57</b> |                |             | <b>0.30</b>   | <b>0.70</b> |
| DP97      | 0.51    | 0.50    | 0.46 <sup>a</sup>             | <b>0.54</b>         | 0.46           | <b>0.54</b> |               |             |                |             |               |             |
| DP101     | 0.47    | 0.50    | <b>0.49</b>                   | <b>0.51</b>         | <b>0.53</b>    | <b>0.47</b> | <b>0.52</b>   | <b>0.48</b> |                |             | <b>0.16</b>   | <b>0.84</b> |
| DP104     | 0.47    | 0.49    | <b>0.59</b>                   | <b>0.41</b>         | <b>0.58</b>    | <b>0.42</b> | <b>0.51</b>   | <b>0.49</b> |                |             | <b>0.56</b>   | <b>0.44</b> |
| DP105     | 0.51    | 0.50    | <b>0.52</b>                   | <b>0.48</b>         | <b>0.40</b>    | <b>0.60</b> | <b>0.35</b>   | <b>0.65</b> | <b>0.23</b>    | <b>0.77</b> | <b>0.36</b>   | <b>0.64</b> |
| DP106     | 0.44    | 0.39    | (0.27) <sup>*</sup>           | <b>0.73</b>         | 0.26           | <b>0.74</b> | 0.17          | <b>0.83</b> | 0.16           | <b>0.84</b> | 0.48          | <b>0.52</b> |
| DP114     | 0.36    | 0.48    | <b>0.59</b>                   | <b>0.41</b>         | <b>0.57</b>    | <b>0.43</b> | <b>0.48</b>   | <b>0.52</b> | <b>0.60</b>    | <b>0.40</b> | <b>0.15</b>   | <b>0.85</b> |
| DP128     | 0.45    | 0.50    | <b>0.49</b>                   | (0.51) <sup>*</sup> | <b>0.56</b>    | 0.44        | <b>0.74</b>   | 0.26        | <b>0.65</b>    | 0.35        | <b>0.35</b>   | 0.65        |
| DP131     | 0.39    | 0.49    | (0.44) <sup>*</sup>           | <b>0.56</b>         | 0.44           | <b>0.56</b> | 0.67          | <b>0.33</b> | 0.54           | <b>0.46</b> | 0.33          | <b>0.67</b> |
| DP133     | 0.42    | 0.49    | 0.44 <sup>a</sup>             | <b>0.56</b>         | 0.53           | <b>0.47</b> | 0.54          | <b>0.46</b> | 0.24           | <b>0.76</b> | 0.12          | <b>0.88</b> |
| DP134     | 0.42    | 0.43    | (0.31) <sup>*</sup>           | <b>0.69</b>         | 0.49           | <b>0.51</b> | 0.54          | <b>0.46</b> | 0.24           | <b>0.76</b> | 0.12          | <b>0.88</b> |
| DP140     | 0.50    | 0.48    | 0.39 <sup>a</sup>             | <b>0.61</b>         | 0.41           | <b>0.59</b> | 0.20          | <b>0.80</b> | 0.18           | <b>0.82</b> | 0.43          | <b>0.57</b> |
| DP152     | 0.53    | 0.42    | <b>0.30</b>                   | 0.70 <sup>a</sup>   | <b>0.35</b>    | 0.65        | <b>0.70</b>   | 0.30        | <b>0.66</b>    | 0.34        | <b>0.26</b>   | 0.74        |
| DP163     | 0.57    | 0.49    | <b>0.44</b>                   | <b>0.56</b>         | <b>0.51</b>    | <b>0.49</b> |               |             |                |             |               |             |
| DP301     | 0.53    | 0.50    | <b>0.46</b>                   | <b>0.54</b>         | <b>0.39</b>    | <b>0.61</b> | <b>0.36</b>   | <b>0.64</b> |                |             | <b>0.42</b>   | <b>0.58</b> |
| DP304     | 0.43    | 0.50    | <b>0.46</b>                   | <b>0.54</b>         |                |             |               |             |                |             |               |             |
| DP307     | 0.17    | 0.50    | (0.48) <sup>*</sup>           | <b>0.52</b>         | 0.41           | <b>0.59</b> | 0.52          | <b>0.48</b> |                |             | 0.41          | <b>0.59</b> |
| DP310     | 0.47    | 0.48    | (0.60) <sup>*</sup>           | <b>0.40</b>         | 0.45           | <b>0.55</b> | 0.50          | <b>0.50</b> |                |             | 0.42          | <b>0.58</b> |
| DP23      | 0.48    | 0.47    | 0.38 <sup>a</sup>             | (0.62) <sup>*</sup> | 0.37           | 0.63        |               |             |                |             |               |             |
| DP38      | 0.45    | 0.43    | 0.32 <sup>a</sup>             | (0.07) <sup>*</sup> | 0.46           | 0.54        |               |             |                |             |               |             |
| DP48      | 0.50    | 0.48    | 0.41 <sup>a</sup>             | (0.59) <sup>*</sup> | 0.50           | 0.50        |               |             |                |             |               |             |
| DP53      | 0.42    | 0.47    | (0.63) <sup>*</sup>           | (0.37) <sup>*</sup> | 0.65           | 0.35        | 0.71          | 0.29        | 0.72           | 0.28        | 0.67          | 0.33        |
| DP79      | 0.37    | 0.41    | 0.29 <sup>a</sup>             | (0.71) <sup>*</sup> | 0.43           | 0.57        | 0.31          | 0.69        | 0.24           | 0.76        | 0.40          | 0.60        |
| DP84      | 0.43    | 0.47    | (0.39) <sup>*</sup>           | (0.62) <sup>*</sup> | 0.45           | 0.55        | 0.50          | 0.50        |                |             | 0.22          | 0.78        |
| DP91      | 0.63    | 0.49    | (0.59) <sup>*</sup>           | (0.42) <sup>*</sup> | 0.61           | 0.39        | 0.65          | 0.35        |                |             | 0.50          | 0.50        |
| DP103     | 0.44    | 0.49    | (0.43) <sup>*</sup>           | (0.57) <sup>*</sup> | 0.49           | 0.51        | 0.26          | 0.74        |                |             | 0.28          | 0.72        |
| DP110     | 0.43    | 0.49    | 0.42 <sup>a</sup>             | (0.59) <sup>*</sup> | 0.48           | 0.52        | 0.43          | 0.57        | 0.36           | 0.64        | 0.93          | 0.07        |
| DP112     | 0.55    | 0.50    | 0.54 <sup>a</sup>             | (0.47) <sup>*</sup> | 0.52           | 0.48        |               |             |                |             |               |             |
| DP116     | 0.60    | 0.49    | (0.56) <sup>*</sup>           | (0.44) <sup>*</sup> | 0.26           | 0.74        | 0.24          | 0.76        | 0.29           | 0.71        | 0.23          | 0.77        |

H (obs), observed heterozygosity; H (exp), expected heterozygosity; Del., Deletion; Ins., Insertion.

<sup>1</sup> Allele frequencies were empirically tested for the German population. All other data are from public repositories; <sup>a</sup> markers were not tested; <sup>b</sup> DIPs included in the final panel are printed in **bold**;

\* removed from final marker panel.

**Table S2.** Technical validation of dPCR assays. Robustness of the dPCR assays was tested changing the indicated variables.

| Variable                 | Description/Reasoning                                                                                                                                                                                                                                                                                                                                                                                                                                                                                                                                                                                                                              | Outcome                                                                                                                                                                                                                                                                                                                                                                                                                                                             |
|--------------------------|----------------------------------------------------------------------------------------------------------------------------------------------------------------------------------------------------------------------------------------------------------------------------------------------------------------------------------------------------------------------------------------------------------------------------------------------------------------------------------------------------------------------------------------------------------------------------------------------------------------------------------------------------|---------------------------------------------------------------------------------------------------------------------------------------------------------------------------------------------------------------------------------------------------------------------------------------------------------------------------------------------------------------------------------------------------------------------------------------------------------------------|
| DNA input                | Different amounts of gDNA (between 20 pg and 280 ng) in order to determine the optimal range with regard to assay performance and reproducibility.                                                                                                                                                                                                                                                                                                                                                                                                                                                                                                 | Results were well reproducible in the range between 1 and 280 ng gDNA.                                                                                                                                                                                                                                                                                                                                                                                              |
| Reaction volumes         | dPCR reaction volumes of 17 $\mu$ L, 18 $\mu$ L, 19 $\mu$ L were tested in comparison to 20 $\mu$ L (as recommended by the manufacturer) to address robustness against loss of reaction volumes, due to handling or not correctly calibrated pipettes.                                                                                                                                                                                                                                                                                                                                                                                             | Deviations in reaction volumes up to $-3 \mu$ L did not influence dPCR results.                                                                                                                                                                                                                                                                                                                                                                                     |
| PCR cycle numbers        | Test of the amplification protocol with 30, 35, 40, 45 cycles using different DNA amounts using a serial dilution of DNA (20 pg, 1 ng, 50 ng, 120 ng, 160 ng) to verify the impact of cycle numbers on assay results.                                                                                                                                                                                                                                                                                                                                                                                                                              | <ul style="list-style-type: none"> <li>• 30 cycles: not in all cases sufficient to ensure separation of positive and negative droplets.</li> <li>• 45 cycles: no further improvement of sensitivity.</li> </ul> <p><math>\Sigma</math>: Optimal results with 35–45 cycles<br/> <ul style="list-style-type: none"> <li>→ Standard: 40 cycles</li> <li>→ Deviation by <math>\pm 5</math> cycles is not critical.</li> </ul> </p>                                      |
| Various PCR thermocycler | Test of standard protocol with following different thermocyclers:<br>(1) Bio-Rad DNA Engine PTC-200 (aluminum block), Bio-Rad Laboratories.<br>(2) Biometra T1 (silver block), Biometra GmbH.<br>(3) Eppendorf Mastercycler ep-S (silver block), Eppendorf AG, Hamburg.<br>(4) Mastercycler nexus (aluminum block), Eppendorf AG, Hamburg.<br>(5) Applied Biosystems GeneAmp <sup>®</sup> PCR System 9700 (aluminum block), Life Technology GmbH, Darmstadt.<br>(6) Applied Biosystems GeneAmp <sup>®</sup> PCR System 9700 (silver block), Life Technology GmbH, Darmstadt.<br>Aim: To assess assay compatibility with different cyler platforms. | <ul style="list-style-type: none"> <li>• All evaluation criterions were fulfilled for each tested cyler (see Table S3).</li> <li>• Further experiments indicated the necessity to adapt ramping rates in dependence on the material of the thermoblock:               <ul style="list-style-type: none"> <li>→ Silver block: 1 K/s</li> <li>→ Aluminum block: 2 K/s</li> </ul> </li> <li>• Excellent intra-assay conformity even with different cyclers.</li> </ul> |

**Table S3.** Technical validation and assay performance on various thermocyclers. Assay performance was tested independently in six different thermocyclers (for details on cyclers, see Supplementary Materials Table S2). To this end, chimerism was assessed on aliquots from defined DNA samples using replicate analyses with the same dPCR assay. Please note the high assay conformity independent of the used thermocycler.

| dPCR-Assay  | TC 1      |      |       | TC 2      |      |       | TC 3      |      |       | TC 4      |      |       | TC 5      |      |       | TC 6      |      |       |
|-------------|-----------|------|-------|-----------|------|-------|-----------|------|-------|-----------|------|-------|-----------|------|-------|-----------|------|-------|
|             | Criterion |      | Ratio | Criterion |      | Ratio | Criterion |      | Ratio | Criterion |      | Ratio | Criterion |      | Ratio | Criterion |      | Ratio |
|             | sep       | spec | (%)   | sep       | spec | (%)   | sep       | spec | (%)   | sep       | spec | (%)   | sep       | spec | (%)   | sep       | spec | (%)   |
| DP67-D+REF  | ✓         | ✓    | 0.56  | ✓         | ✓    | 0.57  | ✓         | ✓    | 0.58  | ✓         | ✓    | 0.59  | ✓         | ✓    | 0.59  | ✓         | ✓    | 0.59  |
| DP70-D+REF  | ✓         | ✓    | 0.99  | ✓         | ✓    | 1.00  | ✓         | ✓    | 1.07  | ✓         | ✓    | 0.97  | ✓         | ✓    | 0.91  | ✓         | ✓    | 1.02  |
| DP70-I+REF  | ✓         | ✓    | 1.00  | ✓         | ✓    | 1.01  | ✓         | ✓    | 1.04  | ✓         | ✓    | 1.04  | ✓         | ✓    | 1.02  | ✓         | ✓    | 1.02  |
| DP97-I+REF  | ✓         | ✓    | 0.43  | ✓         | ✓    | 0.42  | ✓         | ✓    | 0.42  | ✓         | ✓    | 0.43  | ✓         | ✓    | 0.41  | ✓         | ✓    | 0.44  |
| DP101-D+REF | ✓         | ✓    | 0.44  | ✓         | ✓    | 0.45  | ✓         | ✓    | 0.45  | ✓         | ✓    | 0.46  | ✓         | ✓    | 0.47  | ✓         | ✓    | 0.47  |
| DP101-I+REF | ✓         | ✓    | 0.39  | ✓         | ✓    | 0.37  | ✓         | ✓    | 0.38  | ✓         | ✓    | 0.37  | ✓         | ✓    | 0.37  | ✓         | ✓    | 0.37  |
| DP105-D+REF | ✓         | ✓    | 0.40  | ✓         | ✓    | 0.44  | ✓         | ✓    | 0.45  | ✓         | ✓    | 0.44  | ✓         | ✓    | 0.43  | ✓         | ✓    | 0.45  |
| DP105-I+REF | ✓         | ✓    | 0.40  | ✓         | ✓    | 0.44  | ✓         | ✓    | 0.45  | ✓         | ✓    | 0.44  | ✓         | ✓    | 0.43  | ✓         | ✓    | 0.45  |
| DP106-I+REF | ✓         | ✓    | 0.39  | ✓         | ✓    | 0.42  | ✓         | ✓    | 0.43  | ✓         | ✓    | 0.42  | ✓         | ✓    | 0.43  | ✓         | ✓    | 0.42  |
| DP114-D+REF | ✓         | ✓    | 0.35  | ✓         | ✓    | 0.33  | ✓         | ✓    | 0.32  | ✓         | ✓    | 0.31  | ✓         | ✓    | 0.33  | ✓         | ✓    | 0.31  |
| DP114-I+SRY | ✓         | ✓    | 0.77  | ✓         | ✓    | 0.70  | ✓         | ✓    | 0.69  | ✓         | ✓    | 0.77  | ✓         | ✓    | 0.78  | ✓         | ✓    | 0.68  |
| DP128-D+SRY | ✓         | ✓    | 1.30  | ✓         | ✓    | 1.31  | ✓         | ✓    | 1.36  | ✓         | ✓    | 1.42  | ✓         | ✓    | 1.29  | ✓         | ✓    | 1.40  |
| DP131-I+SRY | ✓         | ✓    | 2.92  | ✓         | ✓    | 2.93  | ✓         | ✓    | 2.89  | ✓         | ✓    | 2.91  | ✓         | ✓    | 2.85  | ✓         | ✓    | 2.98  |

TC, thermocycler; sep, clear separation of positive and negative droplets; spec, specificity; ✓, fulfilled.

**Table S4.** Limit of blank for the dPCR assays. The limit of blank (LOB) was determined using standard assay conditions and 120 ng gDNA per assay. Number of positive droplets are shown. In accordance with the LOB, the limit of detection was defined as three to five signals per assay corresponding to 1/6000 (0.017%) to 1/3600 (0.028%) for the tested amount 120 ng gDNA.

| DIP     | dPCR-Assay |          |
|---------|------------|----------|
|         | with REF   | with SRY |
| DP67-D  | 3          | 3        |
| DP70-D  | 0          | 1        |
| DP70-I  | 0          | 0        |
| DP88-D  | 0          | 0        |
| DP88-I  | 0          | 0        |
| DP97-I  | 0          | 0        |
| DP101-D | 0          | 0        |
| DP101-I | 0          | 0        |
| DP104-D | 0          | 0        |
| DP104-I | 0          | 3        |
| DP105-D | 0          | 0        |
| DP105-I | 0          | 0        |
| DP106-I | 1          | 1        |
| DP114-D | 0          | 0        |
| DP114-I | 0          | 0        |
| DP128-D | 0          | 0        |
| DP131-I | 0          | 0        |
| DP133-I | 1          | 1        |
| DP134-I | 1          | 1        |
| DP140-I | 0          | 1        |
| DP152-D | 3          | 3        |
| DP163-D | 0          | 0        |
| DP163-I | 1          | 0        |
| DP301-D | 2          | 0        |
| DP301-I | 0          | 0        |
| DP304-D | 0          | 0        |
| DP304-I | 0          | 0        |
| DP307-I | 0          | 0        |
| DP310-I | 0          | 0        |
| DPSRY   | 3          |          |

**Table S5.** Technical Error. Two different alleles (the marker and the reference gene) were simultaneously quantified in each sample using suitable duplex assays. For homozygous markers, measured copy numbers could directly be compared with assessed numbers of reference alleles, whereas numbers measured for heterozygous marker had to be multiplied by a factor of 2 (see Column “Correction”).

| Heterozygous Marker | Concentration (Copies/ $\mu$ L) |            | Reference | Ratio A/R | Delta (%) |
|---------------------|---------------------------------|------------|-----------|-----------|-----------|
|                     | Homozygous Marker               | Correction |           |           |           |
| 460                 |                                 | 920        | 901       | 1.021     | 2.1       |
| 531                 |                                 | 1062       | 974       | 1.090     | 9.0       |
| 474                 |                                 | 948        | 918       | 1.033     | 3.3       |
| 432                 |                                 | 864        | 945       | 0.914     | 8.6       |
| 450                 |                                 | 900        | 906       | 0.993     | 0.7       |
| 436                 |                                 | 872        | 918       | 0.950     | 5.0       |
| 443                 |                                 | 886        | 938       | 0.945     | 5.5       |
| 425                 |                                 | 850        | 873       | 0.974     | 2.6       |
| 470                 |                                 | 940        | 904       | 1.040     | 4.0       |
| 426                 |                                 | 852        | 846       | 1.007     | 0.7       |
| 452                 |                                 | 904        | 931       | 0.971     | 2.9       |
| 446                 |                                 | 892        | 932       | 0.957     | 4.3       |
| 437                 |                                 | 874        | 918       | 0.952     | 4.8       |
|                     | 908                             | 908        | 918       | 0.989     | 1.1       |
|                     | 842                             | 842        | 846       | 0.995     | 0.5       |
|                     | 945                             | 945        | 930       | 1.016     | 1.6       |
|                     | 906                             | 906        | 924       | 0.981     | 1.9       |
|                     | 914                             | 914        | 948       | 0.964     | 3.6       |
| 452                 |                                 | 904        | 918       | 0.985     | 1.5       |
| 473                 |                                 | 946        | 931       | 1.016     | 1.6       |
| 427                 |                                 | 854        | 926       | 0.922     | 7.8       |
| 435                 |                                 | 870        | 926       | 0.940     | 6.0       |
|                     | 860                             | 860        | 910       | 0.945     | 5.5       |
| 463                 |                                 | 926        | 923       | 1.003     | 0.3       |
| 469                 |                                 | 938        | 926       | 1.013     | 1.3       |
| 437                 |                                 | 874        | 912       | 0.958     | 4.2       |
| 372                 |                                 | 744        | 735       | 1.012     | 1.2       |
|                     | 801                             | 801        | 808       | 0.991     | 0.9       |
| 362                 |                                 | 724        | 790       | 0.916     | 8.4       |
| 389                 |                                 | 778        | 787       | 0.989     | 1.1       |
| 369                 |                                 | 738        | 811       | 0.910     | 9.0       |
| 261                 |                                 | 522        | 511       | 1.022     | 2.2       |
| 375                 |                                 | 750        | 996       | 0.753     | 24.7      |
| 372                 |                                 | 744        | 781       | 0.953     | 4.7       |
| 396                 |                                 | 792        | 791       | 1.001     | 0.1       |
| 390                 |                                 | 780        | 803       | 0.971     | 2.9       |
| 374                 |                                 | 748        | 801       | 0.934     | 6.6       |
| 362                 |                                 | 724        | 765       | 0.946     | 5.4       |
|                     | 752                             | 752        | 817       | 0.920     | 8.0       |
| 372                 |                                 | 744        | 781       | 0.953     | 4.7       |
| 404                 |                                 | 808        | 830       | 0.973     | 2.7       |
|                     | 812                             | 812        | 818       | 0.993     | 0.7       |
|                     | 792                             | 792        | 809       | 0.979     | 2.1       |
| 391                 |                                 | 782        | 796       | 0.982     | 1.8       |
| 401                 |                                 | 802        | 821       | 0.977     | 2.3       |
| 397                 |                                 | 794        | 792       | 1.003     | 0.3       |
| 359                 |                                 | 718        | 788       | 0.911     | 8.9       |
| 356                 |                                 | 712        | 782       | 0.910     | 9.0       |
|                     | 719                             | 719        | 785       | 0.916     | 8.4       |
| 399                 |                                 | 798        | 821       | 0.972     | 2.8       |
| 409                 |                                 | 818        | 820       | 0.998     | 0.2       |
| 384                 |                                 | 768        | 810       | 0.948     | 5.2       |
|                     | 1556                            | 1556       | 1488      | 1.046     | 4.6       |
|                     | 1103                            | 1103       | 1497      | 0.737     | 26.3      |

Table S5. Cont.

| Concentration (Copies/ $\mu$ L) |                   |            |           |               |            |
|---------------------------------|-------------------|------------|-----------|---------------|------------|
| Heterozygous Marker             | Homozygous Marker | Correction | Reference | Ratio A/R     | Delta (%)  |
| 677                             |                   | 1354       | 1521      | 0.890         | 11.0       |
| 690                             |                   | 1380       | 1510      | 0.914         | 8.6        |
|                                 | 1415              | 1415       | 1532      | 0.924         | 7.6        |
|                                 | 1444              | 1444       | 1538      | 0.939         | 6.1        |
|                                 | 1312              | 1312       | 1534      | 0.855         | 14.5       |
| 757                             |                   | 1514       | 1537      | 0.985         | 1.5        |
| 769                             |                   | 1538       | 1515      | 1.015         | 1.5        |
| 667                             |                   | 1334       | 1450      | 0.920         | 8.0        |
| 676                             |                   | 1352       | 1542      | 0.877         | 12.3       |
| 729                             |                   | 1458       | 1533      | 0.951         | 4.9        |
| 789                             |                   | 1578       | 1543      | 1.023         | 2.3        |
|                                 | 1486              | 1486       | 1531      | 0.971         | 2.9        |
|                                 | 1427              | 1427       | 1512      | 0.944         | 5.6        |
|                                 | 1304              | 1304       | 1505      | 0.866         | 13.4       |
| 614                             |                   | 1228       | 1493      | 0.823         | 17.7       |
| 602                             |                   | 1204       | 1473      | 0.817         | 18.3       |
| 774                             |                   | 1548       | 1526      | 1.014         | 1.4        |
|                                 | 435               | 435        | 436       | 0.998         | 0.2        |
| 196                             | 392               | 392        | 439       | 0.893         | 10.7       |
| 212                             |                   | 424        | 442       | 0.959         | 4.1        |
| 208                             |                   | 416        | 430       | 0.967         | 3.3        |
| 201                             |                   | 402        | 420       | 0.957         | 4.3        |
| 210                             |                   | 420        | 420       | 1.000         | 0.0        |
| 211                             |                   | 422        | 438       | 0.963         | 3.7        |
| 213                             |                   | 426        | 429       | 0.993         | 0.7        |
| 211                             |                   | 422        | 434       | 0.972         | 2.8        |
|                                 | 413               | 413        | 431       | 0.958         | 4.2        |
|                                 | 413               | 413        | 433       | 0.954         | 4.6        |
| 207                             |                   | 414        | 421       | 0.983         | 1.7        |
| 206                             |                   | 412        | 420       | 0.981         | 1.9        |
| 215                             |                   | 430        | 428       | 1.005         | 0.5        |
|                                 | 433               | 433        | 431       | 1.005         | 0.5        |
|                                 | 419               | 419        | 431       | 0.972         | 2.8        |
|                                 | 392               | 392        | 430       | 0.912         | 8.8        |
| 197                             |                   | 394        | 422       | 0.934         | 6.6        |
| 190                             |                   | 380        | 411       | 0.925         | 7.5        |
| 217                             |                   | 434        | 435       | 0.998         | 0.2        |
| 215                             |                   | 430        | 419       | 1.026         | 2.6        |
|                                 |                   |            |           | <b>Mean</b>   | <b>4.9</b> |
|                                 |                   |            |           | <b>Median</b> | <b>3.6</b> |
